# Supplementary material for: Uncertainty of oxygen content in highly nonstoichiometric oxides from neutron diffraction data: example of perovskite-type Ba0.5Sr0.5Co0.8Fe0.2O3−δ
Source: Royal Society of Chemistry journal article supplement (doi:10.1039/c6ta10236k), 2017-01-01
Supplement: c6ta10236k1.pdf [file c6ta10236k1.pdf]

**UNCERTAINTY OF OXYGEN CONTENT IN HIGHLY  
NONSTOICHIOMETRIC OXIDES FROM NEUTRON DIFFRACTION DATA:  
EXAMPLE OF PEROVSKITE-TYPE  $\text{Ba}_{0.5}\text{Sr}_{0.5}\text{Co}_{0.8}\text{Fe}_{0.2}\text{O}_{3-\delta}$**

Aleksey A. Yaremchenko,<sup>\*,a</sup> Dmitry D. Khalyavin,<sup>b</sup> Mikhail V. Patrakeev<sup>c</sup>

<sup>a</sup> CICECO – Aveiro Institute of Materials, Department of Materials and Ceramic Engineering, University of Aveiro,  
3810-193 Aveiro, Portugal

<sup>b</sup> ISIS Facility, Rutherford Appleton Laboratory, Harwell Oxford, Didcot, OX11 0QX, United Kingdom

<sup>c</sup> Institute of Solid State Chemistry, UB RAS, 91 Pervomayskaya Str., 620990 Yekaterinburg, Russia

\* Corresponding author. Fax: +351-234-370204; Tel: +351-234-370235; e-mail: ayaremchenko@ua.pt

---

**Electronic supplementary information**

---

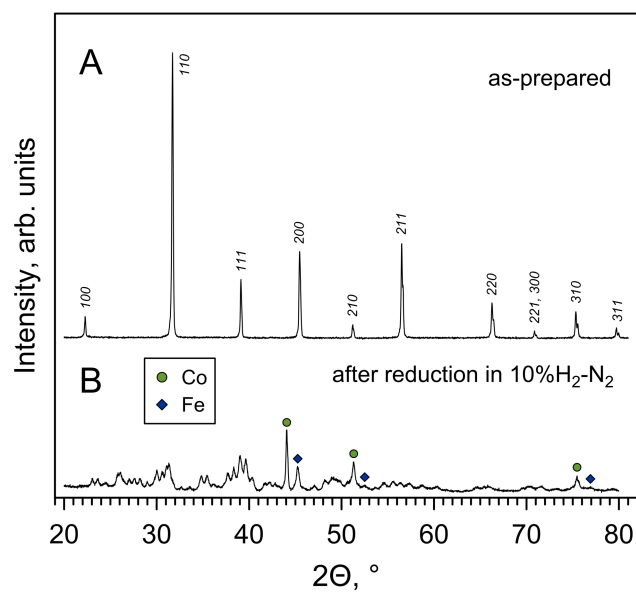

**Fig.S1.** XRD patterns of (A) as-prepared BSCF powder, and (B) product of reduction of BSCF powder in 10%H<sub>2</sub>-N<sub>2</sub> flow at 1000-1100°C for 30 h. Unmarked peaks in the bottom pattern are assigned to a mixture of (Ba,Sr)O and (Ba,Sr)(OH)<sub>2</sub>(H<sub>2</sub>O)<sub>x</sub>.

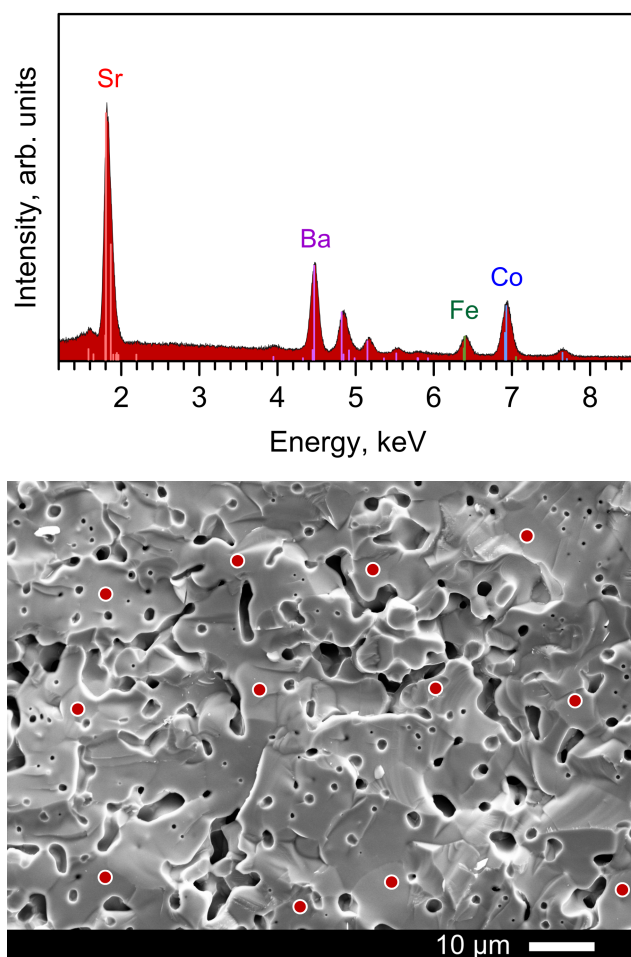

**Fig. S2.** Typical EDS spectrum (top, real time 200 s) obtained from the fractured surface of BSCF ceramics (bottom). Red points in the SEM micrograph indicate the places of spectra collection (electron interaction depth 1.3  $\mu\text{m}$ , radius 0.7  $\mu\text{m}$ ).

**Table S1.** Atomic ratios of cations in A and B sublattices obtained by analysis of EDS spectra.<sup>a</sup>

| Point   | Ba : Sr <sup>b</sup> | Co : Fe <sup>c</sup> |
|---------|----------------------|----------------------|
| 1       | 0.471 : 0.529        | 0.806 : 0.194        |
| 2       | 0.482 : 0.518        | 0.795 : 0.205        |
| 3       | 0.509 : 0.491        | 0.809 : 0.191        |
| 4       | 0.527 : 0.473        | 0.808 : 0.192        |
| 5       | 0.475 : 0.525        | 0.801 : 0.199        |
| 6       | 0.479 : 0.521        | 0.799 : 0.201        |
| 7       | 0.482 : 0.514        | 0.809 : 0.191        |
| 8       | 0.514 : 0.486        | 0.802 : 0.198        |
| 9       | 0.527 : 0.473        | 0.805 : 0.195        |
| 10      | 0.516 : 0.484        | 0.799 : 0.201        |
| 11      | 0.465 : 0.535        | 0.802 : 0.198        |
| 12      | 0.527 : 0.473        | 0.794 : 0.206        |
| Average | 0.498 : 0.502        | 0.802 : 0.198        |

<sup>a</sup> Standardless ZAF method; <sup>b</sup> L series, estimated average error in element fractions is  $\pm 0.038$  atoms;

<sup>c</sup> K series, estimated average error in element fractions is  $\pm 0.024$  atoms

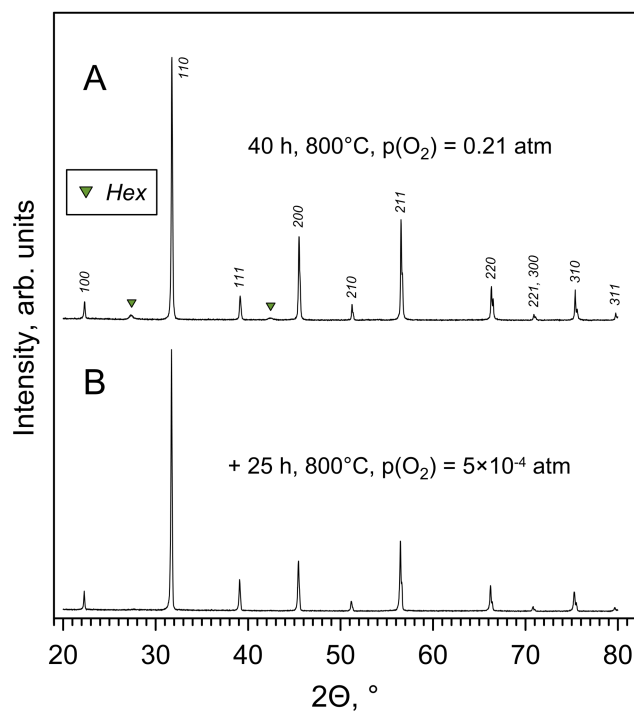

**Fig.S3.** XRD pattern of powdered BSCF calcined at 800°C for 40 h in air ( $\log p(\text{O}_2) = -0.68$  (atm)) (**A**) and then for 25 h at intermediate oxygen partial pressure ( $\log p(\text{O}_2) = -3.3$  (atm)) (**B**). Reflections of the hexagonal phase are indexed according to Ref.(64).
